# Supplementary material for: LINC00461 Promoted Endometrial Carcinoma Growth and Migration by Targeting MicroRNA-219-5p/Cyclooxygenase-2 Signaling Axis
Source: PubMed Central journal article supplement — Cell Transplant. 2021 Feb 12;30:0963689721989616. doi: 10.1177/0963689721989616 (PMC7885031; doi:10.1177/0963689721989616), 2021-02-12
Supplement: sj-pdf-1-cll-10.1177_0963689721989616.pdf [file sj-pdf-1-cll-10.1177_0963689721989616.pdf]

## Supplementary Tables

**Table S1** The primers for qRT-PCR assay.

| <b>Primer Name</b>        | <b>Primer Sequence (5'-3')</b>                   |
|---------------------------|--------------------------------------------------|
| GAPDH RT primer           | random primer                                    |
| GAPDH Reverse primer      | AAATGAGCCCCAGCCTTC                               |
| GAPDH Forward primer      | AATCCCATCACCATCTTCCAG                            |
| LINC00461 RT primer       | random primer                                    |
| LINC00461 Reverse primer  | AATGTTTCCCACTCCTCACC                             |
| LINC00461 Forward primer  | AGCCACTTTTCTCCTTTCCTC                            |
| COX-2 RT primer           | random primer                                    |
| COX-2 Reverse primer      | TGTGTTTGGAGTGGGTTTCAG                            |
| COX-2 Forward primer      | TGTATGAGTGTGGGATTTGACC                           |
| U6 RT primer              | AACGCTTCACGAATTTGCGT                             |
| U6 Reverse primer         | TGGTGTCGTGGAGTCG                                 |
| U6 Forward primer         | CTCGCTTCGGCAGCACA                                |
| miR-219-5p RT primer      | CTCAACTGGTGTCGTGGAGTCGGCAATTCAGTTGA<br>GACTAACAG |
| miR-219-5p Reverse primer | TGGTGTCGTGGAGTCG                                 |
| miR-219-5p Forward primer | TCTTAACGCAAACCAGCTGGTGTGTTGTGAA                  |

**Table S2** The sequences of shRNAs for LINC00461.

| <b>siRNA Name</b> | <b>shRNA Sequence (5'-3')</b> |
|-------------------|-------------------------------|
| sh-RNA-1#         | GCAAAGGCTGACCTGGAAAGT         |
| sh-RNA-2#         | GGTGTCTCAAATGGTTAAAT          |
| sh-RNA-3#         | GCTCTCTGATTCGTTACTTAC         |

**Table S3** Antibodies used in this study.

| <b>Antibody name</b> | <b>Corporation name</b>   | <b>Source</b> | <b>Poly/monoclonal</b> | <b>Dilution ratio</b> |
|----------------------|---------------------------|---------------|------------------------|-----------------------|
| P21                  | Cell Signaling Technology | rabbit        | monoclonal             | 1:1000                |
| CyclinD1             | Cell Signaling Technology | rabbit        | monoclonal             | 1:1000                |
| Bcl-2                | Cell Signaling Technology | rabbit        | monoclonal             | 1:1000                |
| Bax                  | Cell Signaling Technology | rabbit        | monoclonal             | 1:1000                |
| Cleaved caspase3     | Cell Signaling Technology | rabbit        | monoclonal             | 1:1000                |
| E-cadherin           | Cell Signaling Technology | mouse         | monoclonal             | 1:1000                |
| Vimentin             | Cell Signaling Technology | rabbit        | monoclonal             | 1:1000                |
| MMP9                 | Cell Signaling Technology | rabbit        | monoclonal             | 1:1000                |
| MMP2                 | Cell Signaling Technology | rabbit        | monoclonal             | 1:1000                |
| COX-2                | Cell Signaling Technology | rabbit        | monoclonal             | 1:1000                |
| GAPDH                | Thermo Fisher Scientific  | mouse         | monoclonal             | 1:2000                |
| Goat anti-rabbit IgG | Thermo Fisher Scientific  | goat          | monoclonal             | 1:2000                |
| Goat anti-mouse IgG  | Thermo Fisher Scientific  | goat          | monoclonal             | 1:2000                |

**Table S4** The primers for plasmid constructs.

| <b>Primer Name</b>          | <b>Primer Sequence (5'-3')</b>                                |
|-----------------------------|---------------------------------------------------------------|
| LINC00461 Reverse primer    | CAGGTCGACTCTAGACTCGAGATGAGAAGATATAAAC<br>ACAAGAGTAAAAATG      |
| LINC00461 Forward primer    | AACGAGCTCGCTAGCCTCGAGACAAGTAATCCTCGTG<br>TGTGACAGA            |
| COX-2 3'-UTR Reverse primer | CAGGTCGACTCTAGACTCGAGTATAGAAACAATCAAA<br>GTTTATCTTCAGAAA      |
| COX-2 3'-UTR Forward primer | AACGAGCTCGCTAGCCTCGAGAAGTCTAATGATCATA<br>TTTATTTATTTATATGAACC |
